# Supplementary material
Source: PubMed Central journal article supplement (PMC5967608)
Supplement: NIHMS968162-supplement-1.pdf [file NIHMS968162-supplement-1.pdf]

| Gene Symbol | Gene Description                                                                  |
|-------------|-----------------------------------------------------------------------------------|
| MTND1       | mitochondrially encoded NADH:ubiquinone oxidoreductase core subunit 1             |
| MTND3       | NADH dehydrogenase, subunit 3 (complex I)                                         |
| MTND4       | Homo sapiens DC24 mRNA, complete cds.                                             |
| MTND6       | NADH dehydrogenase, subunit 6 (complex I)                                         |
| NDUFA1      | zinc finger protein 183 (RING finger, C3HC4 type)                                 |
| NDUFA2      | NADH dehydrogenase (ubiquinone) 1 alpha subcomplex, 2, 8kDa                       |
| NDUFA3      | NADH dehydrogenase (ubiquinone) 1 alpha subcomplex, 3, 9kDa                       |
| NDUFA4      | NADH dehydrogenase (ubiquinone) 1 alpha subcomplex, 4, 9kDa                       |
| NDUFA5      | NADH dehydrogenase (ubiquinone) 1 alpha subcomplex, 5, 13kDa                      |
| NDUFA6      | NADH dehydrogenase (ubiquinone) 1 alpha subcomplex, 6, 14kDa                      |
| NDUFA7      | NADH dehydrogenase (ubiquinone) 1 alpha subcomplex, 7, 14.5kDa                    |
| NDUFA8      | NADH dehydrogenase (ubiquinone) 1 alpha subcomplex, 8, 19kDa                      |
| NDUFA9      | NADH dehydrogenase (ubiquinone) 1 alpha subcomplex, 9, 39kDa                      |
| NDUFA10     | NADH dehydrogenase (ubiquinone) 1 alpha subcomplex, 10, 42kDa                     |
| NDUFA11     | NADH dehydrogenase (ubiquinone) 1 alpha subcomplex, 11, 14.7kDa                   |
| NDUFAB1     | NADH dehydrogenase (ubiquinone) 1, alpha/beta subcomplex, 1, 8kDa                 |
| NDUFB1      | NADH dehydrogenase (ubiquinone) 1 beta subcomplex, 1, 7kDa                        |
| NDUFB2      | NADH dehydrogenase (ubiquinone) 1 beta subcomplex, 2, 8kDa                        |
| NDUFB3      | NADH dehydrogenase (ubiquinone) 1 beta subcomplex, 3, 12kDa                       |
| NDUFB4      | NADH dehydrogenase (ubiquinone) 1 beta subcomplex, 4, 15kDa                       |
| NDUFB5      | NADH dehydrogenase (ubiquinone) 1 beta subcomplex, 5, 16kDa                       |
| NDUFB6      | NADH dehydrogenase (ubiquinone) 1 beta subcomplex, 6, 17kDa                       |
| NDUFB7      | NADH dehydrogenase (ubiquinone) 1 beta subcomplex, 7, 18kDa                       |
| NDUFB8      | NADH dehydrogenase (ubiquinone) 1 beta subcomplex, 8, 19kDa                       |
| NDUFB9      | NADH dehydrogenase (ubiquinone) 1 beta subcomplex, 9, 22kDa                       |
| NDUFB10     | NADH dehydrogenase (ubiquinone) 1 beta subcomplex, 10, 22kDa                      |
| NDUFC1      | NADH Dehydrogenase (Ubiquinone) 1, Subcomplex Unknown, 1, 6kDa                    |
| NDUFC2      | NADH dehydrogenase (ubiquinone) 1, subcomplex unknown, 2, 14.5kDa                 |
| NDUFS1      | NADH dehydrogenase (ubiquinone) Fe-S protein 1, 75kDa (NADH-coenzyme Q reductase) |
| NDUFS2      | NADH dehydrogenase (ubiquinone) Fe-S protein 2, 49kDa (NADH-coenzyme Q reductase) |
| NDUFS3      | NADH dehydrogenase (ubiquinone) Fe-S protein 3, 30kDa (NADH-coenzyme Q reductase) |
| NDUFS4      | NADH dehydrogenase (ubiquinone) Fe-S protein 4, 18kDa (NADH-coenzyme Q reductase) |

|                                                                                 |                                                                                   |
|---------------------------------------------------------------------------------|-----------------------------------------------------------------------------------|
| NDUFS5                                                                          | NADH dehydrogenase (ubiquinone) Fe-S protein 5, 15kDa (NADH-coenzyme Q reductase) |
| NDUFS6                                                                          | NADH dehydrogenase (ubiquinone) Fe-S protein 6, 13kDa (NADH-coenzyme Q reductase) |
| NDUFS7                                                                          | NADH dehydrogenase (ubiquinone) Fe-S protein 7, 20kDa (NADH-coenzyme Q reductase) |
| NDUFS8                                                                          | NADH dehydrogenase (ubiquinone) Fe-S protein 8, 23kDa (NADH-coenzyme Q reductase) |
| NDUFV1                                                                          | NADH dehydrogenase (ubiquinone) flavoprotein 1, 51kDa                             |
| NDUFV2                                                                          | NADH dehydrogenase (ubiquinone) flavoprotein 2, 24kDa                             |
| NDUFV3                                                                          | NADH dehydrogenase (ubiquinone) flavoprotein 3, 10kDa                             |
| 2. Mitochondrial Complex II: Succinate Dehydrogenase Subunits                   |                                                                                   |
| SDHA                                                                            | Similar to Succinate dehydrogenase [ubiquinone] flavoprotein subunit              |
| SDHB                                                                            | succinate dehydrogenase complex, subunit B, iron sulfur (Ip)                      |
| SDHC                                                                            | integral membrane protein subunit of complex II                                   |
| SDHD                                                                            | succinate dehydrogenase complex, subunit D, integral membrane protein             |
| 3. Mitochondrial Complex III: Ubiquinol-Cytochrome C Reductase Complex Subunits |                                                                                   |
| CYC1                                                                            | cytochrome c-1                                                                    |
| UQCRB                                                                           | ubiquinol-cytochrome c reductase binding protein                                  |
| UQCRC1                                                                          | ubiquinol-cytochrome c reductase core protein I                                   |
| UQCRC2                                                                          | ubiquinol-cytochrome c reductase core protein II                                  |
| UQCRFS1                                                                         | ubiquinol-cytochrome c reductase, Rieske iron-sulfur polypeptide 1                |
| UQCRFS1                                                                         | ubiquinol-cytochrome c reductase, Rieske iron-sulfur polypeptide 1                |
| 4. Mitochondrial Complex IV: Cytochrome C Oxidase Subunits                      |                                                                                   |
| COX4I1                                                                          | cytochrome c oxidase subunit IV isoform 1                                         |
| COX4I2                                                                          | Cytochrome C Oxidase Subunit IV Isoform 2                                         |
| COX5A                                                                           | cytochrome c oxidase subunit Va                                                   |
| COX5B                                                                           | cytochrome c oxidase subunit Vb                                                   |
| COX6A1                                                                          | cytochrome c oxidase subunit VIa polypeptide 1                                    |
| COX6A2                                                                          | cytochrome c oxidase subunit VIa polypeptide 2                                    |
| COX6B                                                                           | cytochrome c oxidase subunit VIb                                                  |

|                                                   |                                                                                                   |
|---------------------------------------------------|---------------------------------------------------------------------------------------------------|
| COX6C                                             | cytochrome c oxidase subunit VIc                                                                  |
| COX7A1                                            | cytochrome c oxidase subunit VIIa polypeptide 1 (muscle)                                          |
| COX7A2                                            | cytochrome c oxidase subunit VIIa polypeptide 2 (liver)                                           |
| COX7B                                             | cytochrome c oxidase subunit VIIb                                                                 |
| COX7C                                             | cytochrome c oxidase subunit VIIc                                                                 |
| COX8A                                             | cytochrome c oxidase subunit VIII                                                                 |
| MTCO1                                             | synonym: COI; go_component: mitochondrial electron transport chain                                |
| MTCO2                                             | synonym: COII; go_component: mitochondrial electron transport chain                               |
| 5. Mitochondrial Complex V: ATP Synthase Subunits |                                                                                                   |
| ATP5A1                                            | ATP synthase, H+ transporting, mitochondrial F1 complex, alpha subunit, isoform 1, cardiac muscle |
| ATP5B                                             | ATP synthase, H+ transporting, mitochondrial F1 complex, beta polypeptide                         |
| ATP5C1                                            | ATP synthase, H+ transporting, mitochondrial F1 complex, gamma polypeptide 1                      |
| ATP5D                                             | ATP synthase, H+ transporting, mitochondrial F1 complex, delta subunit                            |
| ATP5E                                             | ATP synthase, H+ transporting, mitochondrial F1 complex, epsilon subunit                          |
| ATP5F1                                            | ATP synthase, H+ transporting, mitochondrial F0 complex, subunit b, isoform 1                     |
| ATP5G1                                            | ATP synthase, H+ transporting, mitochondrial F0 complex, subunit c (subunit 9), isoform 1         |
| ATP5G2                                            | ATP synthase, H+ transporting, mitochondrial F0 complex, subunit c (subunit 9), isoform 2         |
| ATP5G3                                            | ATP synthase, H+ transporting, mitochondrial F0 complex, subunit c (subunit 9) isoform 3          |
| ATP5H                                             | ATP synthase, H+ transporting, mitochondrial F0 complex, subunit d                                |
| ATP5I                                             | ATP synthase, H+ transporting, mitochondrial F0 complex, subunit e                                |
| ATP5J                                             | ATP synthase, H+ transporting, mitochondrial F0 complex, subunit F6                               |
| ATP5J2                                            | ATP synthase, H+ transporting, mitochondrial F0 complex, subunit f, isoform 2                     |
| ATP5L                                             | ATP synthase, H+ transporting, mitochondrial F0 complex, subunit g                                |
| ATP5O                                             | ATP synthase, H+ transporting, mitochondrial F1 complex                                           |
| MTATP6                                            | synonym: ATP6; go_component: proton-transporting ATP synthase complex                             |
