# Supplementary material
Source: PubMed Central journal article supplement (PMC5967608)
Supplement: NIHMS968162-supplement-2.pdf [file NIHMS968162-supplement-2.pdf]

**MITOCHONDRIAL RESPIRATORY CHAIN COMPLEX**

| Gene                                                        | Group         | Mean       | St. Dev.   | St. Err. Of Mean | Subjects          | p Value    |
|-------------------------------------------------------------|---------------|------------|------------|------------------|-------------------|------------|
| <b>Mitochondrial Complex I: NADH Dehydrogenase Subunits</b> |               |            |            |                  |                   |            |
| MT-ND1                                                      | Young Control | 1.02800718 | 0.07080173 | 0.01668813       | Young vs AD =     | 0.75448854 |
|                                                             | Age Match     | 0.98288848 | 0.07212203 | 0.01414429       | Age Match vs AD = | 0.17192852 |
|                                                             | MCI           | 1.08340493 | 0.08474032 | 0.02679724       | MCI vs AD =       | 0.09700135 |
|                                                             | AD            | 1.01890304 | 0.0999894  | 0.02356773       |                   |            |
| MT-ND3                                                      | Young Control | 1.02418595 | 0.0588488  | 0.00980813       | Young vs AD =     | 0.50676668 |
|                                                             | Age Match     | 0.99212382 | 0.06703552 | 0.00929615       | Age Match vs AD = | 0.29026685 |
|                                                             | MCI           | 1.05012081 | 0.07635421 | 0.01707332       | MCI vs AD =       | 0.13957092 |
|                                                             | AD            | 1.01117903 | 0.10106387 | 0.01684398       |                   |            |
| MT-ND4                                                      | Young Control | 1.01162429 | 0.0599653  | 0.00999422       | Young vs AD =     | 0.64273789 |
|                                                             | Age Match     | 1.00236667 | 0.07181753 | 0.0099593        | Age Match vs AD = | 0.46069765 |
|                                                             | MCI           | 1.05168996 | 0.09346367 | 0.02089911       | MCI vs AD =       | 0.0159276  |
|                                                             | AD            | 0.99986357 | 0.10047843 | 0.01674641       |                   |            |
| MT-ND6                                                      | Young Control | 0.94530292 | 0.40524443 | 0.09551703       | Young vs AD =     | 0.41906128 |
|                                                             | Age Match     | 1.12037127 | 0.47598853 | 0.09334903       | Age Match vs AD = | 0.69574119 |
|                                                             | MCI           | 1.35267293 | 0.57666414 | 0.18235721       | MCI vs AD =       | 0.15788835 |
|                                                             | AD            | 1.0636305  | 0.46091224 | 0.10863806       |                   |            |
| NDUFA1                                                      | Young Control | 1.14792333 | 0.17278707 | 0.0407263        | Young vs AD =     | 2.3549E-05 |
|                                                             | Age Match     | 1.07209287 | 0.2515195  | 0.04932703       | Age Match vs AD = | 0.00644995 |
|                                                             | MCI           | 1.17675001 | 0.30314633 | 0.09586329       | MCI vs AD =       | 0.00193565 |
|                                                             | AD            | 0.88101585 | 0.1538818  | 0.03627029       |                   |            |
| NDUFA2                                                      | Young Control | 1.13389188 | 0.17592231 | 0.02932039       | Young vs AD =     | 3.1468E-08 |
|                                                             | Age Match     | 1.02703842 | 0.20604047 | 0.02857267       | Age Match vs AD = | 0.00098134 |
|                                                             | MCI           | 1.13959809 | 0.26158596 | 0.0584924        | MCI vs AD =       | 3.8266E-05 |
|                                                             | AD            | 0.88753097 | 0.15958275 | 0.02659713       |                   |            |

|         |               |            |            |            |                   |            |
|---------|---------------|------------|------------|------------|-------------------|------------|
| NDUFA3  | Young Control | 1.12304613 | 0.18194251 | 0.04288426 | Young vs AD =     | 0.00021958 |
|         | Age Match     | 0.96858494 | 0.13827238 | 0.02711745 | Age Match vs AD = | 0.08539823 |
|         | MCI           | 1.26701602 | 0.34317511 | 0.1085215  | MCI vs AD =       | 0.00046933 |
|         | AD            | 0.86418873 | 0.19349497 | 0.0456072  |                   |            |
| NDUFA4  | Young Control | 1.12617197 | 0.24249763 | 0.05715724 | Young vs AD =     | 0.00021328 |
|         | Age Match     | 1.0895538  | 0.29653229 | 0.05815477 | Age Match vs AD = | 0.0025883  |
|         | MCI           | 1.27640538 | 0.29737395 | 0.0940379  | MCI vs AD =       | 2.7269E-05 |
|         | AD            | 0.84465092 | 0.15564752 | 0.03668647 |                   |            |
| NDUFA5  | Young Control | 1.03492516 | 0.26525351 | 0.04420892 | Young vs AD =     | 0.00012839 |
|         | Age Match     | 0.99665634 | 0.23696848 | 0.03286162 | Age Match vs AD = | 0.00017806 |
|         | MCI           | 1.16602006 | 0.23590471 | 0.0527499  | MCI vs AD =       | 5.2395E-07 |
|         | AD            | 0.79784404 | 0.22957914 | 0.03826319 |                   |            |
| NDUFA6  | Young Control | 1.17125897 | 0.1871428  | 0.03119047 | Young vs AD =     | 3.3494E-09 |
|         | Age Match     | 1.00151838 | 0.19422895 | 0.02693471 | Age Match vs AD = | 0.00163286 |
|         | MCI           | 1.00539019 | 0.17188072 | 0.0384337  | MCI vs AD =       | 0.00962076 |
|         | AD            | 0.86307752 | 0.19925482 | 0.03320914 |                   |            |
| NDUFA7  | Young Control | 1.19432093 | 0.19389479 | 0.04570144 | Young vs AD =     | 0.00026342 |
|         | Age Match     | 0.9638519  | 0.19208629 | 0.03767122 | Age Match vs AD = | 0.11943535 |
|         | MCI           | 1.00661925 | 0.2639104  | 0.0834558  | MCI vs AD =       | 0.17271371 |
|         | AD            | 0.84370748 | 0.3096179  | 0.07297764 |                   |            |
| NDUFA8  | Young Control | 1.17708053 | 0.2085515  | 0.04915606 | Young vs AD =     | 9.6391E-06 |
|         | Age Match     | 0.99615881 | 0.17018776 | 0.03337657 | Age Match vs AD = | 0.00471492 |
|         | MCI           | 1.10015989 | 0.1575698  | 0.04982795 | MCI vs AD =       | 0.00078495 |
|         | AD            | 0.83381086 | 0.18747411 | 0.04418807 |                   |            |
| NDUFA9  | Young Control | 1.23079869 | 0.27461565 | 0.04576928 | Young vs AD =     | 1.7275E-08 |
|         | Age Match     | 0.98695548 | 0.17800713 | 0.02468515 | Age Match vs AD = | 0.00288635 |
|         | MCI           | 1.09278836 | 0.23495668 | 0.05253791 | MCI vs AD =       | 0.0004369  |
|         | AD            | 0.85580526 | 0.22221405 | 0.03703568 |                   |            |
| NDUFA10 | Young Control | 1.04032592 | 0.21530019 | 0.03588337 | Young vs AD =     | 0.18136131 |
|         | Age Match     | 1.04854099 | 0.22943302 | 0.03181664 | Age Match vs AD = | 0.11753552 |
|         | MCI           | 1.01969705 | 0.47188851 | 0.10551748 | MCI vs AD =       | 0.46035578 |

|         |               |            |            |            |                   |            |
|---------|---------------|------------|------------|------------|-------------------|------------|
|         | AD            | 0.97187895 | 0.21491187 | 0.03581864 |                   |            |
| NDUFA11 | Young Control | 1.12990993 | 0.26373048 | 0.03588917 | Young vs AD =     | 0.00001168 |
|         | Age Match     | 1.03830131 | 0.22222418 | 0.02516193 | Age Match vs AD = | 0.00235286 |
|         | MCI           | 1.11081614 | 0.27926128 | 0.0509859  | MCI vs AD =       | 0.00061711 |
|         | AD            | 0.9190895  | 0.20927296 | 0.02847844 |                   |            |
| NDUFAB1 | Young Control | 1.20107122 | 0.25853183 | 0.06093654 | Young vs AD =     | 3.5091E-06 |
|         | Age Match     | 1.04179727 | 0.28831118 | 0.05654248 | Age Match vs AD = | 0.00135082 |
|         | MCI           | 1.06013849 | 0.2642865  | 0.08357473 | MCI vs AD =       | 0.00336937 |
|         | AD            | 0.76984936 | 0.20635944 | 0.04863939 |                   |            |
| NDUFB1  | Young Control | 1.08966607 | 0.20045194 | 0.02362349 | Young vs AD =     | 1.1517E-05 |
|         | Age Match     | 1.02704225 | 0.20019173 | 0.01963041 | Age Match vs AD = | 0.00606481 |
|         | MCI           | 1.06691348 | 0.2749623  | 0.04347536 | MCI vs AD =       | 0.00562348 |
|         | AD            | 0.9450911  | 0.18049998 | 0.02127213 |                   |            |
| NDUFB2  | Young Control | 1.17289948 | 0.26708689 | 0.03147649 | Young vs AD =     | 2.2029E-05 |
|         | Age Match     | 1.00641992 | 0.21467075 | 0.0210502  | Age Match vs AD = | 0.08498263 |
|         | MCI           | 1.09639083 | 0.17676921 | 0.02794967 | MCI vs AD =       | 0.01118133 |
|         | AD            | 0.9263722  | 0.39467563 | 0.04651297 |                   |            |
| NDUFB3  | Young Control | 1.12995978 | 0.19641952 | 0.04629652 | Young vs AD =     | 1.1696E-05 |
|         | Age Match     | 1.01627596 | 0.18869238 | 0.03700562 | Age Match vs AD = | 0.0018879  |
|         | MCI           | 1.09618119 | 0.22842269 | 0.0722336  | MCI vs AD =       | 0.00093783 |
|         | AD            | 0.84674672 | 0.12770429 | 0.03010019 |                   |            |
| NDUFB4  | Young Control | 0.97279932 | 0.17215385 | 0.02869231 | Young vs AD =     | 0.18265009 |
|         | Age Match     | 1.06146267 | 0.32201642 | 0.04465564 | Age Match vs AD = | 0.96730073 |
|         | MCI           | 1.09879525 | 0.22766828 | 0.05090818 | MCI vs AD =       | 0.63894392 |
|         | AD            | 1.05852162 | 0.34114794 | 0.05685799 |                   |            |
| NDUFB5  | Young Control | 1.17174508 | 0.23581607 | 0.05558238 | Young vs AD =     | 9.7091E-05 |
|         | Age Match     | 1.00530873 | 0.1915386  | 0.03756381 | Age Match vs AD = | 0.02112428 |
|         | MCI           | 1.03605712 | 0.20616892 | 0.06519634 | MCI vs AD =       | 0.0294873  |
|         | AD            | 0.87209565 | 0.16523029 | 0.03894515 |                   |            |
| NDUFB6  | Age Match     | 1.05482183 | 0.2738644  | 0.03100904 | Age Match vs AD = | 0.09324792 |
|         | MCI           | 1.07058673 | 0.25989433 | 0.04745    | MCI vs AD =       | 0.11614419 |

|         |               |            |            |            |                   |            |
|---------|---------------|------------|------------|------------|-------------------|------------|
|         | AD            | 0.97234347 | 0.27793955 | 0.03782278 |                   |            |
| NDUFB7  | Young Control | 1.17378225 | 0.26017436 | 0.06132369 | Young vs AD =     | 0.00109254 |
|         | MCI           | 1.20852206 | 0.3831213  | 0.12115359 | MCI vs AD =       | 0.00865113 |
|         | AD            | 0.89581967 | 0.20372542 | 0.04801854 |                   |            |
| NDUFB8  | Young Control | 1.07170948 | 0.168945   | 0.0229905  | Young vs AD =     | 0.00023262 |
|         | Age Match     | 1.02434403 | 0.16229591 | 0.01837639 | Age Match vs AD = | 0.00698738 |
|         | AD            | 0.93984864 | 0.19001774 | 0.02585814 |                   |            |
| NDUFB9  | Young Control | 1.09192217 | 0.18295725 | 0.04312344 | Young vs AD =     | 0.00246551 |
|         | Age Match     | 1.00343144 | 0.16075225 | 0.03152611 | Age Match vs AD = | 0.03812319 |
|         | MCI           | 1.03062969 | 0.16238554 | 0.05135082 | MCI vs AD =       | 0.05727189 |
| NDUFB10 | Young Control | 1.11379432 | 0.19796883 | 0.03299481 | Young vs AD =     | 5.8227E-06 |
|         | Age Match     | 1.01639945 | 0.1901141  | 0.02636408 | Age Match vs AD = | 0.00529886 |
|         | MCI           | 1.07504276 | 0.20921484 | 0.04678186 | MCI vs AD =       | 0.00129002 |
|         | AD            | 0.90571475 | 0.15987785 | 0.02664631 |                   |            |
| NDUFC1  | Age Match     | 1.00794852 | 0.23826209 | 0.03304101 | Age Match vs AD = | 0.08041224 |
|         | MCI           | 1.08248418 | 0.22103443 | 0.0494248  | MCI vs AD =       | 0.00799267 |
|         | AD            | 0.92191902 | 0.20218408 | 0.03369735 |                   |            |
| NDUFC2  | Young Control | 1.1061876  | 0.25584629 | 0.03481627 | Young vs AD =     | 9.1349E-09 |
|         | MCI           | 1.09739785 | 0.25398899 | 0.04637183 | MCI vs AD =       | 5.5826E-07 |
|         | AD            | 0.84500025 | 0.17068226 | 0.02322691 |                   |            |
| NDUFS1  | Young Control | 1.12457346 | 0.3828069  | 0.05209342 | Young vs AD =     | 0.02178038 |
|         | Age Match     | 0.99225343 | 0.30352477 | 0.03436741 | Age Match vs AD = | 0.57480576 |
|         | AD            | 0.96002918 | 0.35085768 | 0.04774568 |                   |            |
| NDUFS2  | Young Control | 1.25323763 | 0.23616121 | 0.05566373 | Young vs AD =     | 1.4596E-05 |
|         | Age Match     | 1.03211856 | 0.18397952 | 0.03608135 | Age Match vs AD = | 0.0327719  |
|         | MCI           | 0.96558698 | 0.18277025 | 0.05779703 | MCI vs AD =       | 0.44338737 |
|         | AD            | 0.9141639  | 0.15883741 | 0.03743834 |                   |            |
| NDUFS3  | Young Control | 1.16481282 | 0.17970595 | 0.0423571  | Young vs AD =     | 8.3366E-07 |
|         | Age Match     | 0.95377103 | 0.1699497  | 0.03332988 | Age Match vs AD = | 0.0058962  |
|         | MCI           | 0.97763741 | 0.14974968 | 0.04735501 | MCI vs AD =       | 0.01451549 |
|         | AD            | 0.7956323  | 0.18869602 | 0.04447608 |                   |            |

|        |               |            |            |            |                   |            |
|--------|---------------|------------|------------|------------|-------------------|------------|
| NDUFS4 | Young Control | 1.11511854 | 0.28297821 | 0.04716304 | Young vs AD =     | 0.10563073 |
|        | Age Match     | 1.06092784 | 0.28416141 | 0.0394061  | Age Match vs AD = | 0.407591   |
|        | MCI           | 1.03740543 | 0.25198902 | 0.05634646 | MCI vs AD =       | 0.71851503 |
|        | AD            | 1.01213981 | 0.24895853 | 0.04149309 |                   |            |
| NDUFS5 | Young Control | 1.05931992 | 0.18386805 | 0.04333811 | Young vs AD =     | 0.0007205  |
|        | Age Match     | 1.03835352 | 0.21244861 | 0.0354081  | Age Match vs AD = | 0.00192986 |
|        | MCI           | 1.22882843 | 0.3582138  | 0.11327715 | MCI vs AD =       | 0.00058076 |
|        | AD            | 0.83804529 | 0.17304077 | 0.0407861  |                   |            |
| NDUFS6 | Young Control | 1.08273949 | 0.14672675 | 0.03458383 | Young vs AD =     | 0.00016821 |
|        | Age Match     | 1.06767552 | 0.30375288 | 0.05062548 | Age Match vs AD = | 0.03117665 |
|        | MCI           | 1.0751018  | 0.21184335 | 0.06699075 | MCI vs AD =       | 0.00753051 |
|        | AD            | 0.90058516 | 0.10908321 | 0.02571116 |                   |            |
| NDUFS7 | Young Control | 1.12727694 | 0.30011194 | 0.05001866 | Young vs AD =     | 0.01237757 |
|        | Age Match     | 1.0693149  | 0.29639586 | 0.04110271 | Age Match vs AD = | 0.07798005 |
|        | MCI           | 0.98966173 | 0.17146769 | 0.03834134 | MCI vs AD =       | 0.66431209 |
|        | AD            | 0.96321296 | 0.2385687  | 0.03976145 |                   |            |
| NDUFS8 | Young Control | 1.11724034 | 0.39593383 | 0.06598897 | Young vs AD =     | 0.25684904 |
|        | Age Match     | 1.03657493 | 0.30253265 | 0.04195373 | Age Match vs AD = | 0.80611384 |
|        | MCI           | 1.129976   | 0.39355444 | 0.08800145 | MCI vs AD =       | 0.26334802 |
|        | AD            | 1.01999314 | 0.32208337 | 0.05368056 |                   |            |
| NDUFV1 | Young Control | 1.19515601 | 0.2325345  | 0.05480891 | Young vs AD =     | 6.0066E-05 |
|        | Age Match     | 1.0194012  | 0.23056936 | 0.03842823 | Age Match vs AD = | 0.02280118 |
|        | MCI           | 1.06969236 | 0.22839984 | 0.07222637 | MCI vs AD =       | 0.01962912 |
|        | AD            | 0.85887016 | 0.20745591 | 0.04889783 |                   |            |
| NDUFV2 | Young Control | 1.09634135 | 0.24023665 | 0.03269207 | Young vs AD =     | 0.00258215 |
|        | Age Match     | 1.02799819 | 0.24044653 | 0.02722521 | Age Match vs AD = | 0.07301577 |
|        | MCI           | 1.04897221 | 0.23174686 | 0.04231099 | MCI vs AD =       | 0.07972911 |
|        | AD            | 0.94909957 | 0.25525509 | 0.03473582 |                   |            |
| NDUFV3 | Young Control | 1.2214643  | 0.30972869 | 0.05162145 | Young vs AD =     | 1.3596E-05 |
|        | Age Match     | 1.02028553 | 0.27193468 | 0.03771056 | Age Match vs AD = | 0.06563699 |
|        | MCI           | 1.09723599 | 0.24775929 | 0.05540066 | MCI vs AD =       | 0.00975165 |

|                                                                                     |               |            |            |            |                   |            |
|-------------------------------------------------------------------------------------|---------------|------------|------------|------------|-------------------|------------|
|                                                                                     | AD            | 0.915213   | 0.24127544 | 0.04021257 |                   |            |
| <b>Mitochondrial Complex II: Succinate Dehydrogenase Subunits</b>                   |               |            |            |            |                   |            |
| SDHA                                                                                | Young Control | 1.1206809  | 0.20386044 | 0.03397674 | Young vs AD =     | 0.1872563  |
|                                                                                     | Age Match     | 1.06383192 | 0.18358409 | 0.0360038  | Age Match vs AD = | 5.2918E-05 |
|                                                                                     | MCI           | 1.02067267 | 0.14242513 | 0.04503878 | MCI vs AD =       | 8.0818E-03 |
|                                                                                     | AD            | 0.9025785  | 0.15583603 | 0.02597267 |                   |            |
| SDHB                                                                                | Young Control | 1.09378229 | 0.22146122 | 0.0369102  | Young vs AD =     | 0.01992133 |
|                                                                                     | Age Match     | 1.02250605 | 0.24150414 | 0.0334906  | Age Match vs AD = | 0.28459659 |
|                                                                                     | MCI           | 0.99376819 | 0.19027053 | 0.04254579 | MCI vs AD =       | 0.66231432 |
|                                                                                     | AD            | 0.96729624 | 0.22897919 | 0.0381632  |                   |            |
| SDHC                                                                                | Young Control | 1.13107748 | 0.31121506 | 0.03280495 | Young vs AD =     | 8.0113E-05 |
|                                                                                     | Age Match     | 1.00605568 | 0.23108977 | 0.02026791 | Age Match vs AD = | 0.30782768 |
|                                                                                     | MCI           | 0.94964332 | 0.2272395  | 0.03213652 | MCI vs AD =       | 0.46715923 |
|                                                                                     | AD            | 0.97588135 | 0.19002675 | 0.02003058 |                   |            |
| SDHD                                                                                | Young Control | 1.06158011 | 0.12480788 | 0.0294175  | Young vs AD =     | 0.17260402 |
|                                                                                     | Age Match     | 1.03409122 | 0.21144719 | 0.04146821 | Age Match vs AD = | 0.43705688 |
|                                                                                     | MCI           | 1.07498497 | 0.22365626 | 0.07072632 | MCI vs AD =       | 0.27953871 |
|                                                                                     | AD            | 0.98439075 | 0.19919135 | 0.04694985 |                   |            |
| <b>Mitochondrial Complex III: Ubiquinol-Cytochrome C Reductase Complex Subunits</b> |               |            |            |            |                   |            |
| CYC1                                                                                | Young Control | 1.23360826 | 0.20198192 | 0.0476076  | Young vs AD =     | 7.5833E-06 |
|                                                                                     | Age Match     | 1.01319707 | 0.19079155 | 0.0374173  | Age Match vs AD = | 0.0470981  |
|                                                                                     | MCI           | 0.96659248 | 0.19021786 | 0.06015217 | MCI vs AD =       | 0.34012407 |
|                                                                                     | AD            | 0.89576093 | 0.18188145 | 0.04286987 |                   |            |
| UQCRB                                                                               | Young Control | 1.08452627 | 0.21850898 | 0.02973531 | Young vs AD =     | 0.0004079  |
|                                                                                     | Age Match     | 1.0611664  | 0.18977607 | 0.02148791 | Age Match vs AD = | 0.0006953  |
|                                                                                     | MCI           | 1.13868243 | 0.2392305  | 0.04367732 | MCI vs AD =       | 2.6477E-05 |
|                                                                                     | AD            | 0.95658446 | 0.13629397 | 0.01854726 |                   |            |
| UQCRC1                                                                              | Young Control | 1.27423806 | 0.26098769 | 0.06151539 | Young vs AD =     | 5.1875E-06 |
|                                                                                     | Age Match     | 0.99338139 | 0.21405885 | 0.04198039 | Age Match vs AD = | 0.01422636 |
|                                                                                     | MCI           | 1.05910161 | 0.26232163 | 0.08295338 | MCI vs AD =       | 0.02159317 |
|                                                                                     | AD            | 0.81311063 | 0.25125614 | 0.05922164 |                   |            |

|         |               |            |            |            |                   |            |
|---------|---------------|------------|------------|------------|-------------------|------------|
| UQCRC2  | Young Control | 1.14050434 | 0.31440238 | 0.03705268 | Young vs AD =     | 0.00017329 |
|         | Age Match     | 0.9511671  | 0.38491026 | 0.03774356 | Age Match vs AD = | 0.68424035 |
|         | MCI           | 1.04712155 | 0.31666218 | 0.05006869 | MCI vs AD =       | 0.08244838 |
|         | AD            | 0.9377258  | 0.31643215 | 0.03729189 |                   |            |
| UQCRFS1 | Young Control | 1.29162053 | 0.31194988 | 0.07352729 | Young vs AD =     | 1.7544E-05 |
|         | Age Match     | 1.07332228 | 0.32443474 | 0.06362689 | Age Match vs AD = | 0.0116688  |
|         | MCI           | 1.01383652 | 0.35041645 | 0.11081141 | MCI vs AD =       | 0.12087901 |
|         | AD            | 0.84085129 | 0.2222623  | 0.05238773 |                   |            |
| UQCRH   | Young Control | 1.19661221 | 0.25833178 | 0.06088938 | Young vs AD =     | 6.3831E-06 |
|         | Age Match     | 0.98394104 | 0.15183092 | 0.02977649 | Age Match vs AD = | 0.00086107 |
|         | MCI           | 1.16147522 | 0.20080852 | 0.06350123 | MCI vs AD =       | 3.7403E-05 |
|         | AD            | 0.80950994 | 0.16784417 | 0.03956125 |                   |            |

#### Mitochondrial Complex IV: Cytochrome C Oxidase Subunits

|        |               |            |            |            |                   |            |
|--------|---------------|------------|------------|------------|-------------------|------------|
| COX411 | Young Control | 1.09196584 | 0.18261565 | 0.02485084 | Young vs AD =     | 3.7246E-08 |
|        | Age Match     | 1.04741531 | 0.23246708 | 0.02632171 | Age Match vs AD = | 5.7943E-05 |
|        | MCI           | 1.15767098 | 0.30773372 | 0.05618423 | MCI vs AD =       | 1.8246E-06 |
|        | AD            | 0.89573817 | 0.16014915 | 0.02179354 |                   |            |
| COX412 | Young Control | 1.085527   | 0.24583817 | 0.04097303 | Young vs AD =     | 0.04981854 |
|        | Age Match     | 1.03012632 | 0.23056475 | 0.03197358 | Age Match vs AD = | 0.26144815 |
|        | MCI           | 0.99782187 | 0.25579087 | 0.05719658 | MCI vs AD =       | 0.7194537  |
|        | AD            | 0.97378635 | 0.22886902 | 0.03814484 |                   |            |
| COX5A  | Young Control | 1.35485229 | 0.36300366 | 0.06050061 | Young vs AD =     | 9.0621E-12 |
|        | Age Match     | 1.04073885 | 0.28219882 | 0.03913394 | Age Match vs AD = | 6.8618E-06 |
|        | MCI           | 1.15608518 | 0.21723692 | 0.04857565 | MCI vs AD =       | 1.1492E-07 |
|        | AD            | 0.7666089  | 0.23466938 | 0.03911156 |                   |            |
| COX5B  | Young Control | 1.09935588 | 0.18416356 | 0.02170388 | Young vs AD =     | 2.0297E-10 |
|        | Age Match     | 1.00325366 | 0.16760331 | 0.01643486 | Age Match vs AD = | 9.7909E-05 |
|        | MCI           | 1.1540756  | 0.24424361 | 0.03861831 | MCI vs AD =       | 1.6333E-09 |
|        | AD            | 0.90292732 | 0.15884232 | 0.01871975 |                   |            |
| COX6A1 | Young Control | 1.06940802 | 0.14704728 | 0.03465938 | Young vs AD =     | 0.00100857 |
|        | Age Match     | 1.04730158 | 0.2091218  | 0.04101216 | Age Match vs AD = | 0.00913752 |

|        |               |            |            |            |                   |            |
|--------|---------------|------------|------------|------------|-------------------|------------|
|        | MCI           | 1.25877996 | 0.32574579 | 0.10300986 | MCI vs AD =       | 0.00035568 |
|        | AD            | 0.8893139  | 0.15324243 | 0.03611959 |                   |            |
| COX6A2 | Young Control | 1.06188314 | 0.10727623 | 0.02528525 | Young vs AD =     | 0.80392864 |
|        | Age Match     | 0.9336166  | 0.22803993 | 0.04472231 | Age Match vs AD = | 0.06065576 |
|        | MCI           | 0.84057087 | 0.13824872 | 0.04371808 | MCI vs AD =       | 0.01541763 |
|        | AD            | 1.07903124 | 0.27025245 | 0.06369911 |                   |            |
| COX6B1 | Young Control | 1.07710188 | 0.13940034 | 0.03285698 | Young vs AD =     | 2.0120E-05 |
|        | Age Match     | 1.02183543 | 0.19797733 | 0.03882655 | Age Match vs AD = | 0.00169451 |
|        | MCI           | 1.11428509 | 0.19416018 | 0.06139884 | MCI vs AD =       | 0.00028216 |
|        | AD            | 0.83539057 | 0.15342616 | 0.03616289 |                   |            |
| COX6C  | Young Control | 1.12069027 | 0.26196238 | 0.0436604  | Young vs AD =     | 2.6463E-09 |
|        | Age Match     | 1.06574544 | 0.32859531 | 0.04556797 | Age Match vs AD = | 1.7203E-06 |
|        | MCI           | 1.21845253 | 0.32129907 | 0.07184466 | MCI vs AD =       | 7.5677E-09 |
|        | AD            | 0.75361572 | 0.18879334 | 0.03146556 |                   |            |
| COX7A1 | Young Control | 1.37135232 | 0.63006572 | 0.14850792 | Young vs AD =     | 0.02468315 |
|        | Age Match     | 1.06066557 | 0.48419871 | 0.09495918 | Age Match vs AD = | 0.31726762 |
|        | MCI           | 1.34677974 | 0.75511941 | 0.23878973 | MCI vs AD =       | 0.08910108 |
|        | AD            | 0.8981932  | 0.57650194 | 0.13588281 |                   |            |
| COX7A2 | Young Control | 1.06822268 | 0.17013356 | 0.02835559 | Young vs AD =     | 3.3665E-09 |
|        | Age Match     | 1.00621306 | 0.20446848 | 0.02835468 | Age Match vs AD = | 5.6768E-06 |
|        | MCI           | 1.16071249 | 0.22891264 | 0.05118642 | MCI vs AD =       | 6.5881E-09 |
|        | AD            | 0.8131749  | 0.14917238 | 0.02486206 |                   |            |
| COX7B  | Young Control | 1.17743385 | 0.30507548 | 0.03595349 | Young vs AD =     | 9.1017E-18 |
|        | Age Match     | 1.02444146 | 0.28722519 | 0.02816475 | Age Match vs AD = | 1.4410E-10 |
|        | MCI           | 1.2776102  | 0.33873657 | 0.05355896 | MCI vs AD =       | 1.0301E-17 |
|        | AD            | 0.75816673 | 0.19811089 | 0.02334759 |                   |            |
| COX7C  | Young Control | 1.05245574 | 0.15379375 | 0.02092868 | Young vs AD =     | 5.6998E-08 |
|        | Age Match     | 1.070615   | 0.24141081 | 0.02733439 | Age Match vs AD = | 2.3524E-06 |
|        | MCI           | 1.18500878 | 0.25478301 | 0.0465168  | MCI vs AD =       | 6.7510E-10 |
|        | AD            | 0.89289448 | 0.12888938 | 0.01753962 |                   |            |
| COX8A  | Young Control | 1.18793123 | 0.22659476 | 0.0534089  | Young vs AD =     | 0.00052146 |



|        |               |            |            |            |                   |            |
|--------|---------------|------------|------------|------------|-------------------|------------|
|        | Age Match     | 1.10624512 | 0.27518823 | 0.05396885 | Age Match vs AD = | 0.01431161 |
|        | MCI           | 1.16901717 | 0.31300353 | 0.09898041 | MCI vs AD =       | 0.0140759  |
|        | AD            | 0.91032603 | 0.2075595  | 0.04892224 |                   |            |
| MT-CO1 | Young Control | 0.96701744 | 0.07425305 | 0.01237551 | Young vs AD =     | 0.99748239 |
|        | Age Match     | 0.96950509 | 0.06668997 | 0.00924824 | Age Match vs AD = | 0.87691332 |
|        | MCI           | 1.03470916 | 0.04798198 | 0.0107291  | MCI vs AD =       | 0.00223006 |
|        | AD            | 0.96695705 | 0.08707539 | 0.01451257 |                   |            |
| MT-CO2 | Young Control | 1.03183732 | 0.05605921 | 0.0093432  | Young vs AD =     | 0.33451471 |
|        | Age Match     | 0.98977402 | 0.05505711 | 0.00763505 | Age Match vs AD = | 0.11542945 |
|        | MCI           | 1.02408164 | 0.06009235 | 0.01343706 | MCI vs AD =       | 0.67596283 |
|        | AD            | 1.01454186 | 0.0908905  | 0.01514842 |                   |            |

Mitochondrial Complex V: ATP Synthase Subunits

|        |               |            |            |            |                   |            |
|--------|---------------|------------|------------|------------|-------------------|------------|
| ATP5A1 | Young Control | 1.19043585 | 0.22910736 | 0.05400112 | Young vs AD =     | 5.3661E-05 |
|        | Age Match     | 1.06295713 | 0.29698236 | 0.05824303 | Age Match vs AD = | 0.01355025 |
|        | MCI           | 1.15182328 | 0.33758955 | 0.10675519 | MCI vs AD =       | 0.00742499 |
|        | AD            | 0.85389903 | 0.20775659 | 0.0489687  |                   |            |
| ATP5B  | Young Control | 1.22619573 | 0.28580383 | 0.06736461 | Young vs AD =     | 7.9535E-06 |
|        | Age Match     | 1.05690036 | 0.28262157 | 0.05542665 | Age Match vs AD = | 0.00141133 |
|        | MCI           | 1.04341659 | 0.25790512 | 0.08155676 | MCI vs AD =       | 0.00834297 |
|        | AD            | 0.79080416 | 0.20434473 | 0.04816451 |                   |            |
| ATP5C1 | Young Control | 1.14567597 | 0.26930501 | 0.0317379  | Young vs AD =     | 1.8395E-08 |
|        | Age Match     | 1.00060847 | 0.2134178  | 0.02092734 | Age Match vs AD = | 0.00132513 |
|        | MCI           | 1.00086359 | 0.1873688  | 0.02962561 | MCI vs AD =       | 0.01313362 |
|        | AD            | 0.88489319 | 0.2549854  | 0.03005032 |                   |            |
| ATP5D  | Young Control | 1.24154848 | 0.5018277  | 0.0682901  | Young vs AD =     | 1.7760E-07 |
|        | Age Match     | 1.12653406 | 0.60407371 | 0.06839788 | Age Match vs AD = | 0.00041831 |
|        | MCI           | 1.22322252 | 0.4500219  | 0.08216238 | MCI vs AD =       | 9.5626E-07 |
|        | AD            | 0.80902681 | 0.26721823 | 0.0363638  |                   |            |
| ATP5E  | Young Control | 1.08375451 | 0.15926249 | 0.03753853 | Young vs AD =     | 0.01796225 |
|        | Age Match     | 1.06156203 | 0.25299692 | 0.04961678 | Age Match vs AD = | 0.13118763 |
|        | MCI           | 1.25949551 | 0.39968027 | 0.12639    | MCI vs AD =       | 0.00722231 |

|        |               |            |            |            |                   |            |
|--------|---------------|------------|------------|------------|-------------------|------------|
|        | AD            | 0.96067182 | 0.13686489 | 0.03225936 |                   |            |
| ATP5F1 | Young Control | 1.12221492 | 0.32936791 | 0.0448213  | Young vs AD =     | 0.00018393 |
|        | Age Match     | 1.05725654 | 0.28353823 | 0.03210438 | Age Match vs AD = | 0.00190038 |
|        | MCI           | 1.05361722 | 0.28409799 | 0.05186896 | MCI vs AD =       | 0.01407687 |
|        | AD            | 0.90837431 | 0.23628103 | 0.03215378 |                   |            |
| ATP5G1 | Young Control | 1.18335138 | 0.24336057 | 0.05736064 | Young vs AD =     | 3.2319E-06 |
|        | Age Match     | 0.99932172 | 0.18827345 | 0.03692346 | Age Match vs AD = | 0.00042178 |
|        | MCI           | 1.10369748 | 0.1796642  | 0.05681481 | MCI vs AD =       | 0.00016557 |
|        | AD            | 0.77533506 | 0.19435318 | 0.04580948 |                   |            |
| ATP5G2 | Young Control | 1.04480306 | 0.19208715 | 0.03201453 | Young vs AD =     | 0.05731835 |
|        | Age Match     | 1.01312077 | 0.24289935 | 0.03368408 | Age Match vs AD = | 0.22314015 |
|        | MCI           | 1.09282833 | 0.27383576 | 0.06123154 | MCI vs AD =       | 0.03841721 |
|        | AD            | 0.95103431 | 0.21872787 | 0.03645465 |                   |            |
| ATP5G3 | Young Control | 1.2798083  | 0.38924391 | 0.05296939 | Young vs AD =     | 2.3544E-14 |
|        | Age Match     | 1.07121283 | 0.33508036 | 0.03794038 | Age Match vs AD = | 3.2325E-09 |
|        | MCI           | 1.19228844 | 0.35699764 | 0.06517855 | MCI vs AD =       | 3.6331E-10 |
|        | AD            | 0.73872588 | 0.22607216 | 0.03076452 |                   |            |
| ATP5H  | Young Control | 1.08287599 | 0.19785024 | 0.03297504 | Young vs AD =     | 0.00013506 |
|        | Age Match     | 0.9927224  | 0.16626988 | 0.02305748 | Age Match vs AD = | 0.01101994 |
|        | MCI           | 1.0740936  | 0.18584344 | 0.04155586 | MCI vs AD =       | 0.00175323 |
|        | AD            | 0.88801615 | 0.21117673 | 0.03519612 |                   |            |
| ATP5I  | Young Control | 1.16293437 | 0.25324855 | 0.04220809 | Young vs AD =     | 0.0001358  |
|        | Age Match     | 1.03302247 | 0.16495925 | 0.02287573 | Age Match vs AD = | 0.04969705 |
|        | MCI           | 1.03823455 | 0.13842486 | 0.03095274 | MCI vs AD =       | 0.07691379 |
|        | AD            | 0.96397717 | 0.15242377 | 0.02540396 |                   |            |
| ATP5J  | Young Control | 1.08450827 | 0.17968615 | 0.02994769 | Young vs AD =     | 1.5889E-09 |
|        | Age Match     | 1.01063531 | 0.21375685 | 0.02964274 | Age Match vs AD = | 9.6285E-06 |
|        | MCI           | 1.14745824 | 0.21503138 | 0.04808248 | MCI vs AD =       | 7.0341E-09 |
|        | AD            | 0.81857242 | 0.14329803 | 0.02388301 |                   |            |
| ATP5J2 | Young Control | 1.04724749 | 0.14029299 | 0.03306738 | Young vs AD =     | 6.4163E-06 |
|        | Age Match     | 0.97973555 | 0.20426518 | 0.0400597  | Age Match vs AD = | 0.00107888 |

|         |               |            |            |            |                   |            |
|---------|---------------|------------|------------|------------|-------------------|------------|
|         | MCI           | 1.10176506 | 0.22209735 | 0.07023335 | MCI vs AD =       | 0.00014948 |
|         | AD            | 0.77627936 | 0.16386362 | 0.03862303 |                   |            |
| ATP5L   | Young Control | 1.13856783 | 0.20222751 | 0.02383274 | Young vs AD =     | 8.5834E-20 |
|         | Age Match     | 1.00536605 | 0.19325055 | 0.01932506 | Age Match vs AD = | 3.2398E-10 |
|         | MCI           | 1.07310732 | 0.18810049 | 0.0297413  | MCI vs AD =       | 5.5591E-12 |
|         | AD            | 0.82573502 | 0.14629946 | 0.01724156 |                   |            |
| ATP5O   | Young Control | 1.15966665 | 0.22521784 | 0.03753631 | Young vs AD =     | 2.9101E-08 |
|         | Age Match     | 1.10279743 | 0.30204293 | 0.04188582 | Age Match vs AD = | 5.3133E-05 |
|         | MCI           | 1.2194873  | 0.2976526  | 0.06655715 | MCI vs AD =       | 5.6877E-07 |
|         | AD            | 0.86605328 | 0.1700598  | 0.0283433  |                   |            |
| MT-ATP6 | Young Control | 1.01790831 | 0.12225721 | 0.0203762  | Young vs AD =     | 0.03922594 |
|         | Age Match     | 0.97463987 | 0.17228086 | 0.02389106 | Age Match vs AD = | 0.00236915 |
|         | MCI           | 1.11072926 | 0.15371816 | 0.03437243 | MCI vs AD =       | 0.57759941 |
|         | AD            | 1.08670442 | 0.15377022 | 0.02562837 |                   |            |
